# Supplementary material
Source: publisher figshare collection journal article supplement (https://diabetesjournals.figshare.com/ndownloader/files/24704111)
Supplement: Supplementary file 1 [file 24704111]

**Supplemental Table 1.** Characteristics of the study sample by diabetes onset group.

| <b>Characteristics*</b>              | <b>Age of Onset<br/>&lt;55 years<br/>(n=201)</b> | <b>Age of<br/>Onset 55-64<br/>years<br/>(n=255)</b> | <b>Age of Onset<br/>≥65 years<br/>(n=801)</b> | <b>Never<br/>Diabetes<br/>(n=4514)</b> |
|--------------------------------------|--------------------------------------------------|-----------------------------------------------------|-----------------------------------------------|----------------------------------------|
| Examinations, n                      | 9.1±5.2                                          | 11.8±6.4                                            | 17.7±8.2                                      | 12.8±6.6                               |
| Age at baseline, years               | 40.6±7.4                                         | 41.8±7.7                                            | 42.0±8.2                                      | 44.8±8.3                               |
| Age at death, years                  | 71.2±8.4                                         | 75.2±8.3                                            | 86.3±8.3                                      | 79.2±10.4                              |
| Women (%)                            | 93 (46)                                          | 99 (39)                                             | 434 (54)                                      | 2468 (55)                              |
| Body mass index, kg/m <sup>2</sup>   | 28.8±5.9                                         | 28.7±5.2                                            | 26.0±4.4                                      | 25.4±3.9                               |
| Current smoker (%)                   | 108 (54)                                         | 147 (58)                                            | 385 (48)                                      | 2393 (53)                              |
| Fasting blood glucose, mg/dL         | 169±72                                           | 130±47                                              | 102±15                                        | 93±9                                   |
| Non-fasting blood glucose, mg/dL     | 127±54                                           | 96±22                                               | 88±18                                         | 85±16                                  |
| Cholesterol, mg/dL                   | 221±50                                           | 221±44                                              | 217±45                                        | 223±44                                 |
| HDL cholesterol, mg/dL               | 42±14                                            | 43±15                                               | 48±16                                         | 51±16                                  |
| Hypertension (%)                     | 116 (58)                                         | 155 (61)                                            | 354 (44)                                      | 2204 (49)                              |
| Use of anti-hypertensive therapy (%) | 17 (8)                                           | 23 (9)                                              | 32 (4)                                        | 214 (5)                                |
| Use of statins (%)                   | 2 (1)                                            | 5 (2)                                               | 4 (0.5)                                       | 23 (1)                                 |

Data are shown as n (%) or mean ± SD.

Values displayed are from the first examination cycle where these were available, except for the age at death and the age of diabetes onset.

**Supplemental Table 2.** Comparison of the disease duration between those who died from cardiovascular disease vs those who died from non-cardiovascular death

|                       | Cardiovascular Deaths                                                     | Coronary Deaths                                                       | Non-cardiovascular Deaths                          |
|-----------------------|---------------------------------------------------------------------------|-----------------------------------------------------------------------|----------------------------------------------------|
| Characteristic        | Mean duration of diabetes $\pm$ SD<br>(No. Deaths)                        | Mean duration of diabetes $\pm$ SD<br>(No. Deaths)                    | Mean duration of diabetes $\pm$ SD<br>(No. Deaths) |
| Age of diabetes onset |                                                                           |                                                                       |                                                    |
| <55 years             | 22.5 $\pm$ 8.6 (N=94)                                                     | 21.1 $\pm$ 7.9 (N=59)                                                 | 22.6 $\pm$ 9.0 (N=107)                             |
| 55-64 years           | 13.4 $\pm$ 7.7 (N=114)                                                    | 11.5 $\pm$ 7.2 (N=66)                                                 | 16.2 $\pm$ 9.0 (N=141)                             |
| $\geq$ 65 years       | 7.5 $\pm$ 5.6 (N=239)                                                     | 7.9 $\pm$ 5.7 (N=104)                                                 | 7.4 $\pm$ 6.(N=562)                                |
| Overall               | 12.2 $\pm$ 9.1 (N=104)                                                    | 12.3 $\pm$ 8.6 (N=229)                                                | 11.0 $\pm$ 9.1 (N=810)                             |
| <i>P-value</i>        | 0.02 (for cardiovascular deaths vs. non-cardiovascular deaths comparison) | 0.0004 (for coronary deaths vs. non-cardiovascular deaths comparison) | Reference                                          |

**Supplemental 3.** Odds ratio for stroke death versus non-cardiovascular death.

|                       |    | Stroke Deaths       |                               |                         |
|-----------------------|----|---------------------|-------------------------------|-------------------------|
| No. Deaths            |    | Odds Ratios (95%CI) |                               |                         |
| Characteristic        |    | Unadjusted          | Age of death and sex-adjusted | Multivariable adjusted* |
| Age of diabetes onset |    |                     |                               |                         |
| <55 years             | 5  | 3.49 (1.36-9.01)    | 3.24 (1.23-8.55)              | 2.15 (0.35-13.17)       |
| 55-64 years           | 6  | 3.18 (1.33-7.61)    | 3.18 (1.32-7.65)              | 2.74 (0.69-10.84)       |
| ≥65 years             | 8  | 1.06 (0.50-2.28)    | 1.17 (0.53-2.56)              | 1.05 (0.43-2.56)        |
| No diabetes           | 42 | referent            | referent                      | referent                |
| <i>P trend</i>        |    | <0.0001             | <0.01                         | 0.29                    |

\*Multivariable models are adjusted for age at death, sex, smoking status, systolic blood pressure, body mass index, and total cholesterol, use of antihypertensive medications, use of statins, and duration of diabetes (covariates are from first examination at which data were available).

**Supplemental Table 4.** Odds ratio for cardiovascular versus non-cardiovascular deaths, adjusting for covariates assessed at the last examination.

| Characteristic        | CVD Deaths |                   | CHD Deaths |                   | Stroke Deaths |                   |
|-----------------------|------------|-------------------|------------|-------------------|---------------|-------------------|
|                       | No. Deaths | Odd Ratio (95%CI) | No. Deaths | Odd Ratio (95%CI) | No. Deaths    | Odd Ratio (95%CI) |
| Age of diabetes onset |            |                   |            |                   |               |                   |
| <55 years             | 94         | 1.78 (1.08-2.93)  | 59         | 1.75 (0.96-3.21)  | 5             | 1.59 (0.24-10.50) |
| 55-64 years           | 114        | 1.59 (1.10-2.31)  | 66         | 1.56 (1.00-2.43)  | 6             | 1.78 (0.43-7.29)  |
| ≥65 years             | 239        | 1.13 (0.91-1.40)  | 104        | 1.10 (0.82-1.46)  | 8             | 0.72 (0.29-1.78)  |
| No diabetes           | 1375       | Referent          | 732        | Referent          | 42            | Referent          |
| <i>P</i> trend        |            | <i>0.013</i>      |            | <i>0.044</i>      |               | <i>0.481</i>      |

Multivariable models are adjusted for age at death, sex, smoking status, hypertension, body mass index, and total cholesterol, use of antihypertensive, use of statins, and duration of diabetes (covariates are from the last examination, prior to death, at which data were available)

**Supplemental Table 5.** Odds ratio for cardiovascular or coronary death (versus non-cardiovascular death) based on diabetes age of onset, adjusting for risk factors and socio-economic status.

| Characteristic        | Cardiovascular Deaths  |                     | Coronary Deaths        |                    |
|-----------------------|------------------------|---------------------|------------------------|--------------------|
|                       | No. Deaths             | Odds Ratio (95%CI)  | No. Deaths             | Odds Ratio (95%CI) |
|                       | Multivariable adjusted |                     | Multivariable adjusted |                    |
| Age of diabetes onset |                        |                     |                        |                    |
| <55 years             | 85                     | 1.93 (1.11 - 3.33), | 50                     | 1.72 (0.87 - 3.42) |
| 55-64 years           | 94                     | 1.63 (1.08 - 2.47)  | 54                     | 1.55 (0.94 - 2.58) |
| ≥65 years             | 207                    | 1.14 (0.91 - 1.43)  | 85                     | 0.97 (0.71 - 1.33) |
| Never diabetes        | 1168                   | referent            | 631                    | referent           |
| <i>P</i> trend        |                        | 0.01                |                        | 0.007              |

Multivariable models adjusted for age at death, sex, smoking status, systolic blood pressure, body mass index, total cholesterol, use of anti-hypertensives, use of statins, education, occupation and duration of diabetes, based on data from the first examination at which assessment data were available.

**Supplemental Table 6.** Characteristics of the offspring participants according to parental diabetes-onset age

| Characteristic                     | Parental Diabetes Status             |                                             |                                             | <i>P</i> value |
|------------------------------------|--------------------------------------|---------------------------------------------|---------------------------------------------|----------------|
|                                    | Parents without Diabetes<br>(n=1720) | Late-Onset Diabetes in ≥1<br>Parent (n=321) | Early-Onset Diabetes in 1<br>Parent* (n=82) |                |
| Age, years                         | 33.8±9.5                             | 31.9±9.8                                    | 33.8±8.6                                    | 0.003          |
| Women (%)                          | 882 (51)                             | 154 (48)                                    | 36 (44)                                     | 0.26           |
| Body mass index, kg/m <sup>2</sup> | 24.7±4.1                             | 25.3±4.9                                    | 26.1±4.0                                    | 0.001          |
| Systolic blood pressure, mm Hg     | 121±15                               | 121±16                                      | 126±15                                      | 0.01           |
| Diastolic blood pressure, mm Hg    | 79±10                                | 79±11                                       | 83±10                                       | 0.006          |
| Current smoker (%)                 | 734 (43)                             | 128 (40)                                    | 36 (44)                                     | 0.62           |
| Total cholesterol, mg/dL           | 195±38                               | 195±41                                      | 197±33                                      | 0.87           |
| HDL cholesterol, mg/dL             | 52±16                                | 50±15                                       | 48±15                                       | 0.002          |
| Fasting blood glucose, mg/dL       | 100±9                                | 101±11                                      | 102±9                                       | 0.03           |

Data are n (%) or mean (SD). Abbreviations: HDL, high density lipoprotein. Characteristics are from the first examination at which data were available. Characteristics are from the first examination at which data were available.

\*Including one early-onset only, or one early-onset plus one late-onset (there were no families with early-onset diabetes in both parents).

**Supplemental Table 7.** Incident diabetes in offspring by diabetes age-of-onset in parents, according to offspring age bands.

| Age Band                      | Person-Years | Incident DM | No DM in Parents | Late DM in $\geq 1$ Parents | Early DM in 1 Parent <sup>†</sup> |
|-------------------------------|--------------|-------------|------------------|-----------------------------|-----------------------------------|
| <55 years                     | 41804.3      | 63          |                  |                             |                                   |
| Unadjusted model              |              |             | 1.00 [referent]  | 2.29 (1.20-4.39)            | 6.84 (3.51-13.30)                 |
| Multivariable-adjusted model* |              |             | 1.00 [referent]  | 2.28 (1.57-3.31)            | 3.12 (1.68-5.80)                  |
| $\geq 55$ years               | 26192.3      | 149         |                  |                             |                                   |
| Unadjusted model              |              |             | 1.00 [referent]  | 2.05 (1.09-3.88)            | 5.43 (2.87-10.29)                 |
| Multivariable-adjusted model* |              |             | 1.00 [referent]  | 2.25 (1.51-3.36)            | 2.48 (1.23-5.01)                  |

Abbreviations: DM, diabetes.

\*Adjusted for date of birth, sex, body mass index, smoking status

<sup>†</sup>Including 1 parent with early-onset diabetes or 1 with early-onset plus 1 with late-onset diabetes (there were no families with early-onset diabetes in both parents).

**Supplemental Table 8.** Incident diabetes in offspring by diabetes age-of-onset in parents, with early-onset defined as age <50 years.

|                                          | Parental Diabetes Status             |                                              |                                              |
|------------------------------------------|--------------------------------------|----------------------------------------------|----------------------------------------------|
|                                          | Parents without Diabetes<br>(n=1715) | Late-Onset Diabetes in ≥1<br>Parents (n=356) | Early-Onset Diabetes in 1<br>Parent (n=33) † |
| No. with incident diabetes               | 136                                  | 59                                           | 12                                           |
| Person-years of follow-up                | 55336                                | 11255                                        | 956                                          |
| Incidence per 1000 person-years (95% CI) | 25 (21, 29)                          | 52 (41, 68)                                  | 125 (71, 221)                                |
| Hazard ratio (95% CI)                    |                                      |                                              |                                              |
| Unadjusted model                         | 1.00 [referent]                      | 2.20 (1.56 - 3.11) ‡                         | 5.70 (2.97 - 10.92) ‡                        |
| Multivariable-adjusted model*            | 1.00 [referent]                      | 2.23 (1.55 - 3.21) ‡                         | 4.13 (1.80 - 9.49) ‡                         |

CI, confidence interval.

\*Adjusted for age, sex, body mass index, and smoking status.

†Including 1 early-onset parent or 1 early-onset plus 1 late-onset parent.

‡ $P < 0.001$
